# Supplementary material
Source: PubMed Central journal article supplement (PMC2597606)
Supplement: blood-2008-03-144543_2.pdf [file blood-2008-03-144543_2.pdf]

| Donor cells      | $\alpha_4$ expression (MFI) |            | Ratio (KI/WT) |
|------------------|-----------------------------|------------|---------------|
|                  | KI                          | WT         |               |
| Before injection | 28.9 ± 0.1                  | 55.9 ± 0.3 | 0.52 ± 0.004  |
| Homed to:        |                             |            |               |
| SP               | 28.7 ± 1.5                  | 55.6 ± 2.2 | 0.52 ± 0.05   |
| PLN              | 20.7 ± 1.8                  | 45.8 ± 2.6 | 0.46 ± 0.06   |
| MLN              | 27.3 ± 0.6                  | 49.7 ± 2.4 | 0.55 ± 0.03   |
| PP               | 28.9 ± 1.3                  | 52.3 ± 2.3 | 0.56 ± 0.04   |

Data are mean values ± SEM of 4 independent experiments. Abbreviations: SP, spleen; PLN, peripheral lymph node; MLN, mesenteric lymph node; PP, Peyer's patch.
